# Supplementary material
Source: PubMed Central journal article supplement (PMC9068834)
Supplement: NIHMS1764005-supplement-Supplementary_Material.pdf [file NIHMS1764005-supplement-Supplementary_Material.pdf]

## Appendices

### Appendix A: ASPREE and ALSOP Study Characteristics

**Table A1: ASPREE Inclusion and Exclusion Criteria**

| Inclusion Criteria                                                                                                                                                                                                                                                                                                 | Exclusion Criteria <sup>65</sup>                                                                                                                                                                                                                                                                                                                                                                                                                                                                                                                                                                                                                                                                                                                                                                                                                                                                                                                                                                 |
|--------------------------------------------------------------------------------------------------------------------------------------------------------------------------------------------------------------------------------------------------------------------------------------------------------------------|--------------------------------------------------------------------------------------------------------------------------------------------------------------------------------------------------------------------------------------------------------------------------------------------------------------------------------------------------------------------------------------------------------------------------------------------------------------------------------------------------------------------------------------------------------------------------------------------------------------------------------------------------------------------------------------------------------------------------------------------------------------------------------------------------------------------------------------------------------------------------------------------------------------------------------------------------------------------------------------------------|
| <ul style="list-style-type: none"><li>• Men and women 70 years and over living in Australia or the U.S.</li><li>• Or aged 65 years and over for U.S. African American and Hispanic/Latino men and women</li><li>• Willing and able to provide informed consent</li><li>• Accepting of study requirements</li></ul> | <ul style="list-style-type: none"><li>• History of diagnosed cardiovascular event</li><li>• Clinical diagnosis of atrial fibrillation</li><li>• Serious intercurrent illness likely to cause death in <math>\leq 5</math> years</li><li>• Current or recurrent condition with high risk of major bleeding</li><li>• Anaemia</li><li>• Contraindication/allergy to aspirin</li><li>• Current participation in a clinical trial</li><li>• Current continuous use of aspirin for secondary prevention OR any other anti-platelet drug or anticoagulant</li><li>• Systolic blood pressure <math>\geq 180</math> mmHg and/or a diastolic blood pressure <math>\geq 105</math> mmHg</li><li>• A diagnosis of dementia or a Modified Mini-Mental State Examination (3MS) score <math>\leq 77</math></li><li>• Severe difficulty/inability to perform any one of the 6 Katz Activities of Daily Living</li><li>• Pill-taking compliance <math>&lt; 80\%</math> during the placebo run-in phase</li></ul> |

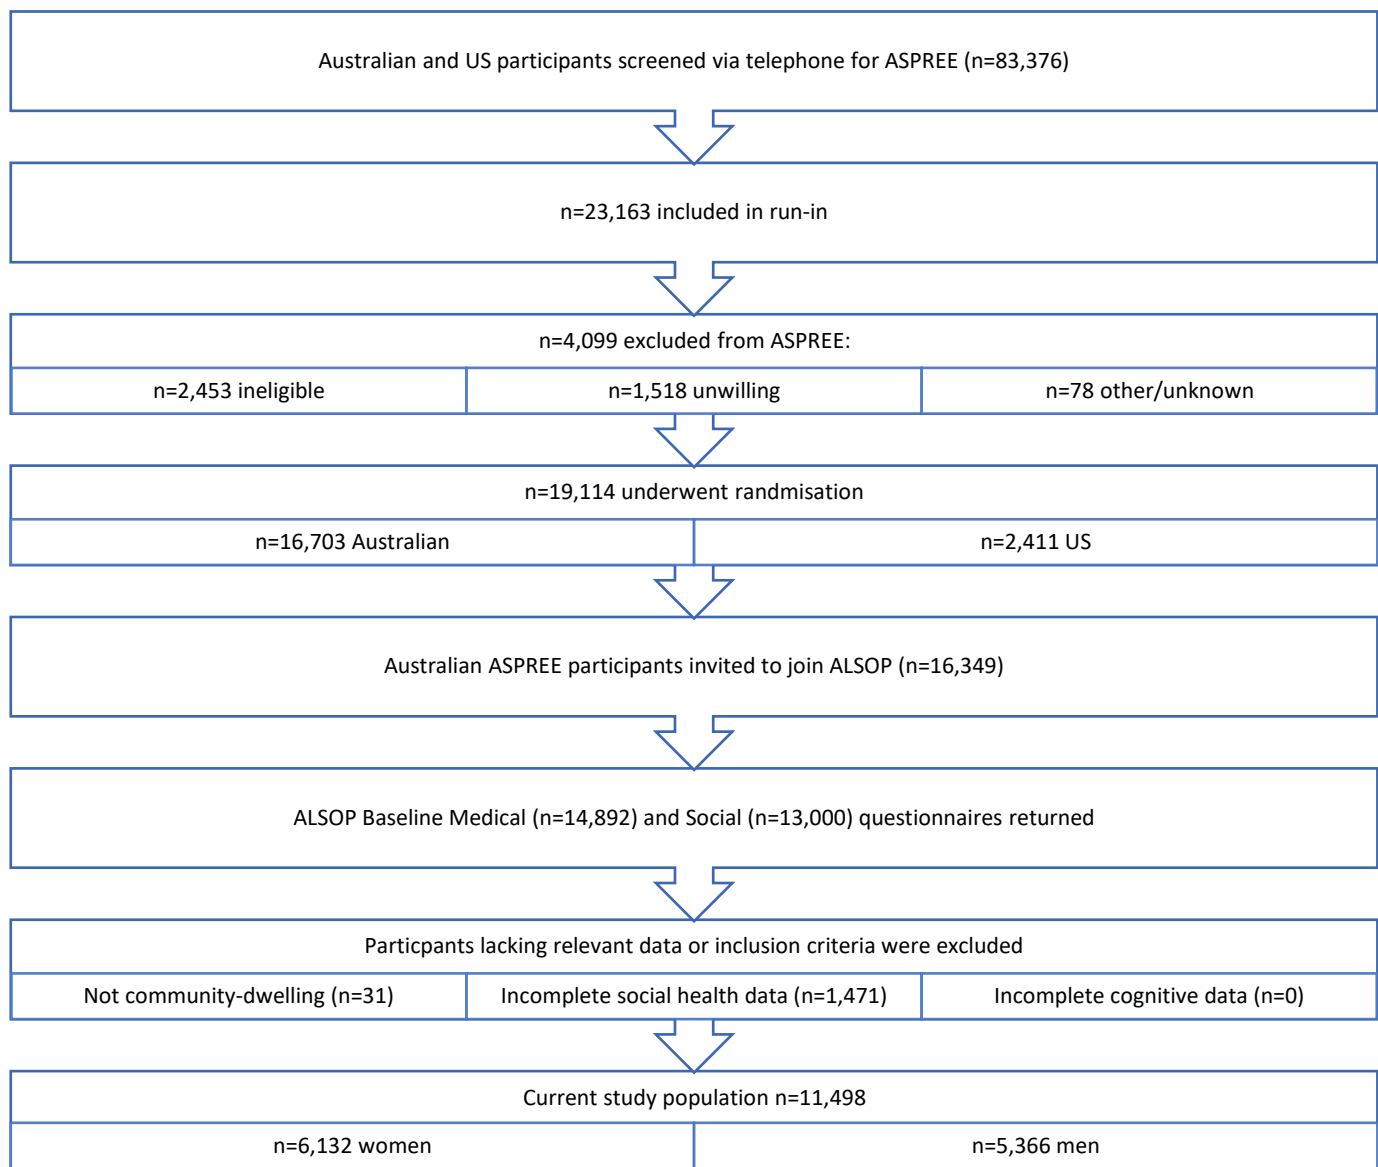

**Figure A1: ASPREE, ALSOP and the current study's participant screening and inclusion**

*Ineligible participants were those who did not meet the inclusion/exclusion criteria. All Australian ASPREE participants were invited to join the ALSOP sub-study with 89% success rate. This figure depicts the responses to the ALSOP Baseline Medical and Social questionnaires and flowchart of inclusion in the current study.<sup>24</sup>*

## Appendix B: Defining Social Health

**Table B1: Determinants of Social Health**

| Component Measured        | Derivation | Question(s)                                                                                                                                                                                                                                        | Cut off      |
|---------------------------|------------|----------------------------------------------------------------------------------------------------------------------------------------------------------------------------------------------------------------------------------------------------|--------------|
| <b>Social Isolation</b>   | LSNS       | <ul style="list-style-type: none"> <li>How many friends/relatives do you see or hear from at least once a month?</li> </ul>                                                                                                                        | ≤4 per month |
|                           |            | <ul style="list-style-type: none"> <li>How often do you go to a club/local organisation/neighbourhood/other small group, church/temple/place of worship/take part in related activities, or attend an educational class?</li> </ul>                | <1 per month |
| <b>Low Social Support</b> | LSNS       | <ul style="list-style-type: none"> <li>How many friends/relatives do you feel at ease with that you can talk about private matters?</li> <li>How many friends/relatives do you feel close to such that you could call on them for help?</li> </ul> | <4 people    |
| <b>Loneliness</b>         | CES-D      | <ul style="list-style-type: none"> <li>During the past week I felt lonely.</li> </ul>                                                                                                                                                              | 3-7 days     |

*LSNS=Lubben Social Network Scale; CES-D=Center for Epidemiological Studies – Depression*

**Table B2: Defining Social Health**

|                                                                                                               | Derivation     | Total<br>n (%) | Women<br>n (%)       | Men<br>n (%)         |
|---------------------------------------------------------------------------------------------------------------|----------------|----------------|----------------------|----------------------|
| <b>Total</b>                                                                                                  |                |                | <b>6,132 (53.3%)</b> | <b>5,366 (47.7%)</b> |
| <b>Social Isolation</b>                                                                                       |                |                |                      |                      |
| <b>How often do you go to a club, local organisation, neighbourhood or other small group?</b>                 | <b>SNS-621</b> |                |                      |                      |
| Never                                                                                                         |                | 1,880 (16.4%)  | 878 (14.3%)          | 1,002 (18.7%)        |
| Rarely (<1 per month)                                                                                         |                | 1,491 (13%)    | 689 (11.2%)          | 802 (15%)            |
| Sometimes (1 – 3 per month)                                                                                   |                | 2,553 (22.2%)  | 1,457 (23.8%)        | 1,096 (20.4%)        |
| Often (>1 per week)                                                                                           |                | 5,083 (44.2%)  | 2,870 (46.8%)        | 2,213 (41.2%)        |
| Always (most days)                                                                                            |                | 491 (4.3%)     | 238 (3.9%)           | 253 (4.7%)           |
| <b>How often do you attend an educational class?</b>                                                          | <b>SNS-621</b> |                |                      |                      |
| Never                                                                                                         |                | 7,690 (66.9%)  | 3,796 (61.9%)        | 3,894 (72.6%)        |
| Rarely (<1 per month)                                                                                         |                | 2,280 (19.8%)  | 1,286 (21%)          | 994 (18.5%)          |
| Sometimes (1 – 3 per month)                                                                                   |                | 696 (6%)       | 447 (7.3%)           | 249 (4.6%)           |
| Often (>1 per week)                                                                                           |                | 900 (7%)       | 581 (9.5%)           | 219 (4.1%)           |
| Always (most days)                                                                                            |                | 32 (0.3%)      | 22 (0.4%)            | 10 (0.2%)            |
| <b>How often do you go to a church, temple or other place of worship, or take part in related activities?</b> | <b>SNS-621</b> |                |                      |                      |
| Never                                                                                                         |                | 6,162 (53.6%)  | 2,988 (48.7%)        | 3,174 (59.2%)        |
| Rarely (<1 per month)                                                                                         |                | 1,813 (15.8%)  | 955 (15.6%)          | 858 (16%)            |
| Sometimes (1 – 3 per month)                                                                                   |                | 696 (6.1%)     | 409 (6.7%)           | 287 (5.4%)           |
| Often (>1 per week)                                                                                           |                | 2,484 (21.6%)  | 1,546 (25.2%)        | 938 (17.5%)          |
| Always (most days)                                                                                            |                | 343 (3%)       | 234 (3.8%)           | 109 (2%)             |
| <b>How many friends do you see or hear from at least once a month?</b>                                        | <b>SNS-621</b> |                |                      |                      |
| None                                                                                                          |                | 214 (1.9%)     | 78 (1.3%)            | 136 (2.5%)           |
| 1                                                                                                             |                | 234 (2%)       | 100 (1.6%)           | 134 (2.5%)           |
| 2                                                                                                             |                | 777 (6.8%)     | 380 (6.2%)           | 397 (7.4%)           |

|                                                                                |                |               |               |               |
|--------------------------------------------------------------------------------|----------------|---------------|---------------|---------------|
| 3-4                                                                            |                | 2,873 (25%)   | 1,538 (25.1%) | 1,355 (24.9%) |
| 5-8                                                                            |                | 3,360 (29.2%) | 1,930 (31.5%) | 1,430 (26.7%) |
| 9+                                                                             |                | 4,040 (35.1%) | 2,106 (34.3%) | 1,934 (36%)   |
| <b>How many relatives do you see or hear from at least once a month?</b>       | <b>SNS-621</b> |               |               |               |
| None                                                                           |                | 162 (1.41%)   | 87 (1.4%)     | 75 (1.4%)     |
| 1                                                                              |                | 405 (3.5%)    | 207 (3.4%)    | 198 (3.7%)    |
| 2                                                                              |                | 892 (7.8%)    | 490 (8%)      | 402 (7.5%)    |
| 3-4                                                                            |                | 3,279 (28.5%) | 1,717 (28%)   | 1,562 (29.1%) |
| 5-8                                                                            |                | 3,820 (33.2%) | 2,093 (34.1%) | 1,727 (32.2%) |
| 9+                                                                             |                | 2,940 (25.6%) | 1,538 (25.1%) | 1,402 (26.1%) |
| <b>Social Support</b>                                                          |                |               |               |               |
| <b>How many friends do you feel you can talk with about private matters?</b>   | <b>SNS-621</b> |               |               |               |
| None                                                                           |                | 951 (8.3%)    | 348 (5.7%)    | 603 (11.2%)   |
| 1                                                                              |                | 867 (7.5%)    | 461 (7.5%)    | 406 (7.6%)    |
| 2                                                                              |                | 2,484 (21.6%) | 1,362 (22.2%) | 1,122 (20.9%) |
| 3-4                                                                            |                | 4,414 (38.4%) | 2,518 (41.1%) | 1,896 (35.3%) |
| 5-8                                                                            |                | 1,874 (16.3%) | 1,053 (17.2%) | 821 (15.3%)   |
| 9+                                                                             |                | 908 (7.9%)    | 390 (6.4%)    | 518 (9.7%)    |
| <b>How many relatives do you feel you can talk with about private matters?</b> | <b>SNS-621</b> |               |               |               |
| None                                                                           |                | 383 (3.3%)    | 163 (2.7%)    | 220 (4.1%)    |
| 1                                                                              |                | 826 (7.2%)    | 429 (7%)      | 397 (7.4%)    |
| 2                                                                              |                | 1,811 (15.8%) | 1,058 (17.3%) | 753 (14%)     |
| 3-4                                                                            |                | 4,590 (39.9%) | 2,494 (40.7%) | 2,096 (39.1%) |
| 5-8                                                                            |                | 2,571 (22.4%) | 1,352 (21.6%) | 1,246 (23.2%) |
| 9+                                                                             |                | 1,317 (11.5%) | 663 (10.8%)   | 654 (12.2%)   |
| <b>How many friends do you feel you could call upon for help?</b>              | <b>SNS-621</b> |               |               |               |
| None                                                                           |                | 588 (5.1%)    | 282 (4.6%)    | 306 (5.7%)    |
| 1                                                                              |                | 743 (6.5%)    | 400 (6.5%)    | 343 (6.4%)    |
| 2                                                                              |                | 2,191 (19.1%) | 1,252 (20.4%) | 939 (17.5%)   |
| 3-4                                                                            |                | 4,575 (39.8%) | 2,483 (40.5%) | 2,092 (39%)   |

|                                                                     |                |               |               |               |
|---------------------------------------------------------------------|----------------|---------------|---------------|---------------|
| 5-8                                                                 |                | 2,250 (19.6%) | 1,221 (19.9%) | 1,029 (19.2%) |
| 9+                                                                  |                | 1,151 (10%)   | 494 (8.1%)    | 657 (12.2%)   |
| <b>How many relatives do you feel you could call upon for help?</b> | <b>SNS-621</b> |               |               |               |
| None                                                                |                | 288 (2.5%)    | 165 (2.7%)    | 123 (2.3%)    |
| 1                                                                   |                | 594 (5.2%)    | 352 (5.7%)    | 242 (4.5%)    |
| 2                                                                   |                | 1,624 (14.1%) | 896 (14.6%)   | 728 (13.6%)   |
| 3-4                                                                 |                | 4,391 (38.2%) | 2,310 (37.7%) | 2,081 (38.8%) |
| 5-8                                                                 |                | 3,041 (26.5%) | 1,595 (26%)   | 1,446 (27%)   |
| 9+                                                                  |                | 1,560 (13.6%) | 814 (13.3%)   | 746 (13.9%)   |
| <hr/>                                                               |                |               |               |               |
| <b>Loneliness</b>                                                   |                |               |               |               |
| <b>During the past week I felt lonely.</b>                          | <b>CES-D</b>   |               |               |               |
| Rarely or none of the time (<1 day)                                 |                | 9,932 (86.4%) | 5,140 (83.8%) | 4,792 (89.3%) |
| Some or a little of the time (1-2 days)                             |                | 1,007 (8.8%)  | 657 (10.7%)   | 350 (6.5%)    |
| Occasionally or a moderate amount of time (3-4 days)                |                | 428 (3.7%)    | 259 (4.2%)    | 169 (3.2%)    |
| All of the time (5-7 days)                                          |                | 131 (1.1%)    | 76 (1.2%)     | 55 (1%)       |

*SNS-621=Social Network Scale; CES-D=Centre for Epidemiological Studies – Depression Scale*

Appendix C: Baseline Demographic, Social Health and Cognitive Health Data

**Table C1: Baseline Demographic Data for Women and Men**

|                                          | Women<br>n (%) | Men<br>n (%)  | P value |
|------------------------------------------|----------------|---------------|---------|
| <b>Total</b>                             | 6,132 (53.3%)  | 5,366 (46.7%) |         |
| <b>Age (years)</b>                       |                |               |         |
| Mean ± SD                                | 75.1 ± 4.2     | 75 ± 4.2      |         |
| 70-74                                    | 3,641 (59.4%)  | 3,307 (61.6%) | 0.04    |
| 75-79                                    | 1,629 (26.6%)  | 1,326 (24.7%) |         |
| 80+                                      | 862 (14.1%)    | 733 (13.7%)   |         |
| <b>Country Born</b>                      |                |               |         |
| Australia                                | 4,784 (78%)    | 3,934 (73.3%) | <0.001  |
| Not Australia                            | 1,348 (22%)    | 1,432 (26.7%) |         |
| <b>Education (years)</b>                 |                |               |         |
| ≤12                                      | 3,755 (61.2%)  | 2,951 (55%)   | <0.001  |
| >12                                      | 2,377 (38.8%)  | 2,415 (45%)   |         |
| <b>Paid or Volunteer Work</b>            |                |               |         |
| No                                       | 1,369 (22.3%)  | 1,438 (26.8%) | <0.001  |
| Paid/Volunteer Work <sup>a</sup>         | 4,763 (77.7%)  | 3,927 (73.2%) |         |
| <b>Partner Status</b>                    |                |               |         |
| Unpartnered                              | 2,842 (46.3%)  | 999 (18.6%)   | <0.001  |
| Partnered <sup>b</sup>                   | 3,290 (53.7%)  | 4,367 (81.4%) |         |
| <b>Living Situation</b>                  |                |               |         |
| At home with family/friends              | 3,636 (59.3%)  | 4,339 (80.9%) | <0.001  |
| At home alone                            | 2,496 (40.7%)  | 1,027 (19.1%) |         |
| <b>BMI (kg/m<sup>2</sup>)</b>            |                |               |         |
| Mean ± SD                                | 28 ± 5.1       | 27.9 ± 3.8    | 0.04    |
| <b>Depressive Symptoms (CES-D Score)</b> |                |               |         |
| Mean ± SD                                | 3.3 ± 3.3      | 2.8 ± 3       |         |
| <8                                       | 5,516 (90%)    | 4,959 (92.4%) | <0.001  |
| ≥8                                       | 616 (10%)      | 407 (7.6%)    |         |
| <b>Smoking History</b>                   |                |               |         |
| Current/Former                           | 2,042 (33.3%)  | 3,050 (56.8%) | <0.001  |
| Never                                    | 4,091 (66.7%)  | 2,316 (43.2%) |         |

SD=Standard Deviation; BMI=Body Mass Index; CES-D=Centre for Epidemiological Studies – Depression Scale

<sup>a</sup> Paid/Volunteer work includes caring and babysitting

<sup>b</sup> Partner status includes married, de facto, and living with partner

**Table C2: Baseline Social Health in Women and Men**

|                                | Women                | Men                  | P value |
|--------------------------------|----------------------|----------------------|---------|
|                                | n (%)                | n (%)                |         |
| <b>Total</b>                   | <b>6,132 (53.3%)</b> | <b>5,366 (46.7%)</b> |         |
| <b>Social Isolation</b>        |                      |                      |         |
| Not socially isolated          | 6,049 (98.6%)        | 5,224 (97.4%)        | <0.001  |
| Socially isolated              | 83 (1.4%)            | 142 (2.6%)           |         |
| <b>Social Support</b>          |                      |                      |         |
| Socially supported             | 6,026 (98.3%)        | 5,242 (97.7%)        | 0.03    |
| Low social support             | 106 (1.7%)           | 124 (2.3%)           |         |
| <b>Loneliness</b>              |                      |                      |         |
| Not lonely                     | 5,797 (94.5%)        | 5,142 (95.8%)        | <0.001  |
| Lonely                         | 335 (5.5%)           | 224 (4.2%)           |         |
| <b>Composite Social Health</b> |                      |                      |         |
| Positive                       | 5,655 (92.2%)        | 4,930 (91.9%)        |         |
| Discordant <sup>a</sup>        | 142 (2.3%)           | 212 (4%)             | <0.001  |
| Lonely                         | 335 (5.5%)           | 224 (4.2%)           |         |

<sup>a</sup>Discordant Social Health=socially isolated and/or low social support, but not lonely

**Table C3: Baseline Distribution of Cognitive Scores Stratified by Gender**

|                                    | Women                |            | Men                  |            | P value |
|------------------------------------|----------------------|------------|----------------------|------------|---------|
|                                    | n (%)                | Mean ± SD  | n (%)                | Mean ± SD  |         |
| <b>Total</b>                       | <b>6,132 (53.3%)</b> |            | <b>5,366 (46.7%)</b> |            |         |
| <b>3MS Overall Score</b>           | 6,132 (53.3%)        | 94.5 ± 4.0 | 5,366 (46.7%)        | 93.1 ± 4.5 | <0.001  |
| <b>COWAT Overall Score</b>         | 6,125 (53.3%)        | 13 ± 4.6   | 5,359 (46.7%)        | 11.8 ± 4.6 | <0.001  |
| <b>SDMT Overall Score</b>          | 6,112 (53.3%)        | 39.1 ± 9.7 | 5,349 (47.7%)        | 36.4 ± 9.7 | <0.001  |
| <b>HVLT-R Delayed Recall Score</b> | 6,098 (53.3%)        | 8.4 ± 2.6  | 5,343 (47.7%)        | 7.4 ± 2.8  | <0.001  |

SD=Standard Deviation; 3MS=Modified Mini-Mental State Examination; COWAT=Controlled Oral Word Association Test; SDMT=Symbol-Digit Modalities Test; HVLT-R=Hopkin's Verbal Learning Test – Revised



Appendix D: Age-Adjusted Analyses of Associations of Social Health

**Table D1: Age-Adjusted Analyses of Baseline Social Health and Baseline Cognitive Function in Women and Men**

|                                | 3MS               |       |           |       |         | COWAT             |       |           |       |         | SDMT              |       |           |       |         | HVLTR-Delayed Recall |       |           |       |         |
|--------------------------------|-------------------|-------|-----------|-------|---------|-------------------|-------|-----------|-------|---------|-------------------|-------|-----------|-------|---------|----------------------|-------|-----------|-------|---------|
|                                | Mean ± SD         | β     | 95% CI    |       | P value | Mean ± SD         | β     | 95% CI    |       | P value | Mean ± SD         | β     | 95% CI    |       | P value | Mean ± SD            | β     | 95% CI    |       | P value |
| <b>Women</b>                   | <b>94.5 ± 4</b>   |       |           |       |         | <b>12.9 ± 4.6</b> |       |           |       |         | <b>39.1 ± 9.7</b> |       |           |       |         | <b>8.4 ± 2.6</b>     |       |           |       |         |
| Socially Isolated (vs. not)    | 93.2 ± 4.5        | -1.35 | -2.21     | -0.49 | <0.001  | 11.6 ± 4.5        | -1.41 | -2.41     | -0.42 | 0.01    | 36.7 ± 10.5       | -2.51 | -4.51     | -0.50 | 0.01    | 7.6 ± 2.9            | -0.86 | -1.42     | -0.30 | <0.001  |
| Low Social Support (vs. not)   | 93 ± 4.7          | -1.59 | -2.36     | -0.83 | <0.001  | 11.8 ± 4.5        | -1.18 | -2.07     | -0.30 | 0.01    | 36.3 ± 10.8       | -2.80 | -4.58     | -1.03 | <0.001  | 7.5 ± 2.8            | -0.91 | -1.42     | -0.41 | <0.001  |
| Lonely (vs. not)               | 94 ± 4.1          | -0.47 | -0.90     | -0.03 | 0.04    | 12.5 ± 4.8        | -0.44 | -0.94     | 0.07  | 0.09    | 37 ± 9.9          | -1.72 | -2.74     | -0.70 | <0.001  | 8.3 ± 2.6            | -0.07 | -0.36     | 0.21  | 0.62    |
| <b>Mutually Adjusted</b>       |                   |       |           |       |         |                   |       |           |       |         |                   |       |           |       |         |                      |       |           |       |         |
| Socially Isolated (vs. not)    |                   | -0.88 | -1.78     | 0.02  | 0.06    |                   | -1.11 | -2.15     | -0.06 | 0.04    |                   | -1.67 | -3.77     | 0.42  | 0.12    |                      | -0.61 | -1.19     | -0.02 | 0.04    |
| Low Social Support (vs. not)   |                   | -1.34 | -2.13     | -0.54 | <0.001  |                   | -0.87 | -1.79     | 0.06  | 0.07    |                   | -2.26 | -4.12     | -0.40 | 0.02    |                      | -0.75 | -1.27     | -0.22 | 0.01    |
| Lonely (vs. not)               |                   | -0.43 | -0.87     | 0.01  | 0.05    |                   | -0.41 | -0.91     | 0.10  | 0.11    |                   | -1.66 | -2.68     | -0.64 | <0.001  |                      | -0.05 | -0.33     | 0.23  | 0.73    |
| <b>Composite Social Health</b> |                   |       |           |       |         |                   |       |           |       |         |                   |       |           |       |         |                      |       |           |       |         |
| Positive                       | 94.6 ± 4          |       | Reference |       |         | 13 ± 4.6          |       | Reference |       |         | 39.3 ± 9.6        |       | Reference |       |         | 8.4 ± 2.6            |       | Reference |       |         |
| Discordant <sup>a</sup>        | 93 ± 4.5          | -1.63 | -2.29     | -0.97 | <0.001  | 12 ± 4.7          | -0.99 | -1.75     | -0.22 | 0.01    | 36.7 ± 10.4       | -2.72 | -4.25     | -1.18 | <0.001  | 7.6 ± 2.8            | -0.93 | -1.36     | -0.49 | <0.001  |
| Lonely                         | 94 ± 4.1          | -0.51 | -0.94     | -0.07 | 0.02    | 12.5 ± 4.8        | -0.46 | -0.97     | 0.05  | 0.07    | 37 ± 9.9          | -1.79 | -2.81     | -0.77 | <0.001  | 8.3 ± 2.6            | -0.09 | -0.38     | 0.19  | 0.52    |
| <b>Men</b>                     | <b>93.1 ± 4.5</b> |       |           |       |         | <b>11.8 ± 4.6</b> |       |           |       |         | <b>36.4 ± 9.7</b> |       |           |       |         | <b>7.4 ± 2.8</b>     |       |           |       |         |
| Socially Isolated (vs. not)    | 92.9 ± 4.6        | -0.24 | -0.99     | 0.50  | 0.52    | 11.7 ± 4.6        | -0.01 | -0.77     | 0.75  | 0.97    | 33.8 ± 8.8        | -2.71 | -4.26     | -1.16 | <0.001  | 7.2 ± 3              | -0.16 | -0.62     | 0.31  | 0.51    |
| Low Social Support (vs. not)   | 93 ± 4.5          | 0.01  | -0.78     | 0.81  | 0.98    | 11.2 ± 4.5        | -0.53 | -1.35     | 0.28  | 0.20    | 36 ± 8.9          | -0.03 | -1.71     | 1.65  | 0.97    | 6.9 ± 2.8            | -0.42 | -0.91     | 0.07  | 0.10    |
| Lonely (vs. not)               | 92.4 ± 4.4        | -0.50 | -1.10     | 0.10  | 0.10    | 11.3 ± 4.1        | -0.44 | -1.06     | 0.17  | 0.16    | 34.3 ± 9          | -1.33 | -2.58     | -0.07 | 0.04    | 6.9 ± 2.9            | -0.30 | -0.67     | 0.07  | 0.11    |
| <b>Mutually Adjusted</b>       |                   |       |           |       |         |                   |       |           |       |         |                   |       |           |       |         |                      |       |           |       |         |
| Socially Isolated (vs. not)    |                   | -0.24 | -1.00     | 0.53  | 0.55    |                   | 0.14  | -0.65     | 0.93  | 0.73    |                   | -2.81 | -4.42     | -1.21 | <0.001  |                      | -0.05 | -0.52     | 0.43  | 0.85    |

|                                |            |                  |       |      |            |                  |       |       |            |                  |          |       |           |                  |      |           |       |       |      |      |
|--------------------------------|------------|------------------|-------|------|------------|------------------|-------|-------|------------|------------------|----------|-------|-----------|------------------|------|-----------|-------|-------|------|------|
| Low Social Support (vs. not)   | 0.09       | -0.73            | 0.91  | 0.83 | -0.56      | -1.40            | 0.28  | 0.19  | 0.76       | -0.97            | 2.50     | 0.39  | -0.40     | -0.91            | 0.11 | 0.13      |       |       |      |      |
| Lonely (vs. not)               | -0.49      | -1.09            | 0.10  | 0.11 | -0.44      | -1.05            | 0.17  | 0.16  | -1.23      | -2.48            | 0.02     | 0.05  | -0.29     | -0.66            | 0.08 | 0.13      |       |       |      |      |
| <b>Composite Social Health</b> |            |                  |       |      |            |                  |       |       |            |                  |          |       |           |                  |      |           |       |       |      |      |
| Positive                       | 93.1 ± 4.5 | <i>Reference</i> |       |      | 11.8 ± 4.6 | <i>Reference</i> |       |       | 36.6 ± 9.7 | <i>Reference</i> |          |       | 7.4 ± 2.8 | <i>Reference</i> |      |           |       |       |      |      |
| Discordant <sup>a</sup>        | 93.0 ± 4.6 | -0.06            | -0.67 | 0.56 | 0.86       | 11.2 ± 4.4       | -0.59 | -1.22 | 0.04       | 0.07             | 34.7 ± 9 | -1.64 | -2.93     | -0.35            | 0.01 | 7.2 ± 2.9 | -0.20 | -0.58 | 0.18 | 0.30 |
| Lonely                         | 92.4 ± 4.4 | -0.50            | -1.10 | 0.09 | 0.10       | 11.3 ± 4.1       | -0.47 | -1.08 | 0.14       | 0.13             | 34.3 ± 9 | -1.40 | -2.65     | -0.14            | 0.03 | 6.9 ± 2.9 | -0.31 | -0.68 | 0.06 | 0.11 |

*SD=Standard Deviation; β=Coefficient; CI=Confidence Interval; 3MS=Modified Mini-Mental State Examination; COWAT=Controlled Oral Word Association Test;*

*SDMT=Symbol-Digit Modalities Test; HVLT-R=Hopkin's Verbal Learning Test – Revised*

*<sup>a</sup>Discordant Social Health=socially isolated and/or low social support, but not lonely*

**Table D2: Age-Adjusted Analyses of Longitudinal Associations Between Social Health and Cognitive Decline**

|                                | No Cognitive Decline<br>n (%) | Cognitive Decline<br>n (%) | HR   | 95% CI           |      | P value |
|--------------------------------|-------------------------------|----------------------------|------|------------------|------|---------|
| <b>Women</b>                   | <b>5,230 (85.3%)</b>          | <b>824 (13.4%)</b>         |      |                  |      |         |
| Socially Isolated (vs. not)    | 64 (81%)                      | 15 (19%)                   | 1.35 | 0.81             | 2.26 | 0.25    |
| Low Social Support (vs. not)   | 82 (80.4%)                    | 20 (19.6%)                 | 1.44 | 0.92             | 2.25 | 0.11    |
| Lonely (vs. not)               | 282 (85.2%)                   | 49 (14.8%)                 | 1.05 | 0.78             | 1.40 | 0.76    |
| <b>Mutually Adjusted</b>       |                               |                            |      |                  |      |         |
| Socially Isolated (vs. not)    |                               |                            | 1.23 | 0.72             | 2.10 | 0.46    |
| Low Social Support (vs. not)   |                               |                            | 1.37 | 0.86             | 2.18 | 0.19    |
| Lonely (vs. not)               |                               |                            | 1.03 | 0.77             | 1.38 | 0.83    |
| <b>Composite Social Health</b> |                               |                            |      |                  |      |         |
| Positive                       | 4,836 (86.6%)                 | 750 (13.4%)                |      | <i>Reference</i> |      |         |
| Discordant                     | 112 (81.8%)                   | 25 (18.3%)                 | 1.34 | 0.90             | 2.00 | 0.15    |
| Lonely                         | 282 (85.2%)                   | 49 (14.8%)                 | 1.05 | 0.79             | 1.41 | 0.72    |
| <b>Men</b>                     | <b>4,531 (84.4%)</b>          | <b>780 (14.5%)</b>         |      |                  |      |         |
| Socially Isolated (vs. not)    | 122 (86.5%)                   | 19 (13.5%)                 | 0.94 | 0.60             | 1.49 | 0.80    |
| Low Social Support (vs. not)   | 103 (83.7%)                   | 20 (16.3%)                 | 1.23 | 0.79             | 1.92 | 0.36    |
| Lonely (vs. not)               | 181 (81.5%)                   | 41 (18.5%)                 | 1.17 | 0.85             | 1.60 | 0.34    |
| <b>Mutually Adjusted</b>       |                               |                            |      |                  |      |         |
| Socially Isolated (vs. not)    |                               |                            | 0.89 | 0.56             | 1.43 | 0.64    |
| Low Social Support (vs. not)   |                               |                            | 1.26 | 0.80             | 1.99 | 0.32    |
| Lonely (vs. not)               |                               |                            | 1.16 | 0.85             | 1.60 | 0.34    |
| <b>Composite Social Health</b> |                               |                            |      |                  |      |         |
| Positive                       | 4,169 (85.5%)                 | 709 (14.5%)                |      | <i>Reference</i> |      |         |
| Discordant <sup>a</sup>        | 181 (85.8%)                   | 30 (14.2%)                 | 1.00 | 0.69             | 1.44 | 1.00    |
| Lonely                         | 181 (81.5%)                   | 41 (18.5%)                 | 1.17 | 0.85             | 1.60 | 0.34    |

Derived from a population of 11,498 followed for mean  $4.5 \pm 1.2$  SD years. Cognitive decline had 40,249 person years of observation (mean  $3.5 \pm 1.5$  SD years; median 3.1, IQR 5.0-2.9 years; range 0.6 – 7.1 years).

HR=Hazard Ratio; CI=Confidence Interval

<sup>a</sup>Discordant Social Health=socially isolated and/or low social support, but not lonely

**Table D3: Age-Adjusted Analyses of Longitudinal Associations Between Social Health and Dementia**

|                                | No Dementia<br>n (%)  | Dementia<br>n (%) | HR   | 95% CI    |      | P value |
|--------------------------------|-----------------------|-------------------|------|-----------|------|---------|
| <b>Dementia Trigger</b>        | <b>11,092 (96.5%)</b> | <b>406 (3.5%)</b> |      |           |      |         |
| Socially Isolated (vs. not)    | 216 (96%)             | 9 (4%)            | 1.14 | 0.59      | 2.20 | 0.70    |
| Low Social Support (vs. not)   | 215 (93.5%)           | 15 (6.5%)         | 1.85 | 1.11      | 3.10 | 0.02    |
| Lonely (vs. not)               | 536 (95.9%)           | 23 (4.1%)         | 1.05 | 0.69      | 1.61 | 0.81    |
| <b>Mutually Adjusted</b>       |                       |                   |      |           |      |         |
| Socially Isolated (vs. not)    |                       |                   | 0.92 | 0.46      | 1.84 | 0.81    |
| Low Social Support (vs. not)   |                       |                   | 1.89 | 1.10      | 3.25 | 0.02    |
| Lonely (vs. not)               |                       |                   | 1.04 | 0.68      | 1.59 | 0.85    |
| <b>Composite Social Health</b> |                       |                   |      |           |      |         |
| Positive                       | 10,223 (96.6%)        | 362 (3.4%)        |      | reference |      |         |
| Discordant <sup>a</sup>        | 333 (94.1%)           | 21 (5.9%)         | 1.71 | 1.10      | 2.66 | 0.02    |
| Lonely                         | 536 (95.9%)           | 23 (4.1%)         | 1.08 | 0.71      | 1.64 | 0.73    |
| <b>Dementia Case</b>           | <b>11,269 (98%)</b>   | <b>229 (2%)</b>   |      |           |      |         |
| Socially Isolated (vs. not)    | 219 (97.3%)           | 6 (2.7%)          | 1.37 | 0.61      | 3.08 | 0.45    |
| Low Social Support (vs. not)   | 221 (96.1%)           | 9 (3.9%)          | 1.97 | 1.01      | 3.84 | 0.05    |
| Lonely (vs. not)               | 549 (98.2%)           | 10 (1.8%)         | 0.78 | 0.41      | 1.48 | 0.45    |
| <b>Mutually Adjusted</b>       |                       |                   |      |           |      |         |
| Socially Isolated (vs. not)    |                       |                   | 1.11 | 0.47      | 2.62 | 0.82    |
| Low Social Support (vs. not)   |                       |                   | 1.94 | 0.95      | 3.93 | 0.07    |
| Lonely (vs. not)               |                       |                   | 0.77 | 0.41      | 1.45 | 0.42    |
| <b>Composite Social Health</b> |                       |                   |      |           |      |         |
| Positive                       | 10,378 (98%)          | 207 (2%)          |      | reference |      |         |
| Discordant <sup>a</sup>        | 342 (96.6%)           | 12 (3.4%)         | 1.72 | 0.96      | 3.08 | 0.07    |
| Lonely                         | 549 (98.2%)           | 10 (1.8%)         | 0.80 | 0.42      | 1.51 | 0.49    |

Derived from a population of 11,498 followed for mean  $4.5 \pm 1.2$  SD years. Dementia trigger had 51,151 person years of observation (mean  $4.4 \pm 1.3$  SD years; median 4.5, IQR 5.5-3.5 years; range 0.2 – 7.3 years). Dementia cases had 51,400 person years of observation (mean  $4.5 \pm 1.2$  SD years; median 4.5, IQR 5.5-3.5 years; range 0.2 – 7.3 years).

HR=Hazard Ratio; CI=Confidence Interval

<sup>a</sup>Discordant Social Health=socially isolated and/or low social support, but not lonely

Appendix E: Multivariable Adjusted Analyses of Associations of Social Health without CES-D

Table E1: Fully Adjusted Multivariable Analyses without CES-D of Baseline Social Health and Baseline Cognitive Function in Women and Men

|                                | 3MS               |       |                  |       |         | COWAT             |       |                  |       |         | SDMT              |       |                  |       |         | HVLTR-Delayed Recall |       |                  |       |         |
|--------------------------------|-------------------|-------|------------------|-------|---------|-------------------|-------|------------------|-------|---------|-------------------|-------|------------------|-------|---------|----------------------|-------|------------------|-------|---------|
|                                | Mean ± SD         | β     | 95% CI           |       | P value | Mean ± SD         | β     | 95% CI           |       | P value | Mean ± SD         | β     | 95% CI           |       | P value | Mean ± SD            | β     | 95% CI           |       | P value |
| <b>Women</b>                   | <b>94.5 ± 4</b>   |       |                  |       |         | <b>12.9 ± 4.6</b> |       |                  |       |         | <b>39.1 ± 9.7</b> |       |                  |       |         | <b>8.4 ± 2.6</b>     |       |                  |       |         |
| Socially Isolated (vs. not)    | 93.2 ± 4.5        | -1.15 | -1.99            | -0.30 | 0.01    | 11.6 ± 4.5        | -1.22 | -2.19            | -0.25 | 0.01    | 36.7 ± 10.5       | -2.41 | -4.38            | -0.43 | 0.02    | 7.6 ± 2.9            | -0.81 | -1.36            | -0.25 | <0.001  |
| Low Social Support (vs. not)   | 93.0 ± 4.7        | -1.39 | -2.14            | -0.64 | <0.001  | 11.8 ± 4.5        | -1.00 | -1.86            | -0.14 | 0.02    | 36.3 ± 10.8       | -2.72 | -4.48            | -0.97 | <0.001  | 7.5 ± 2.8            | -0.86 | -1.36            | -0.37 | <0.001  |
| Lonely (vs. not)               | 94.0 ± 4.1        | -0.38 | -0.81            | 0.06  | 0.09    | 12.5 ± 4.8        | -0.30 | -0.79            | 0.20  | 0.25    | 37 ± 9.9          | -1.62 | -2.63            | -0.60 | <0.001  | 8.3 ± 2.6            | -0.06 | -0.34            | 0.23  | 0.70    |
| <b>Mutually Adjusted</b>       |                   |       |                  |       |         |                   |       |                  |       |         |                   |       |                  |       |         |                      |       |                  |       |         |
| Socially Isolated (vs. not)    |                   | -0.74 | -1.63            | 0.14  | 0.10    |                   | -0.97 | -1.98            | 0.05  | 0.06    |                   | -1.61 | -3.68            | 0.46  | 0.13    |                      | -0.57 | -1.15            | 0.01  | 0.06    |
| Low Social Support (vs. not)   |                   | -1.17 | -1.96            | -0.39 | <0.001  |                   | -0.73 | -1.63            | 0.18  | 0.11    |                   | -2.21 | -4.05            | -0.38 | 0.02    |                      | -0.71 | -1.23            | -0.18 | 0.01    |
| Lonely (vs. not)               |                   | -0.35 | -0.78            | 0.08  | 0.12    |                   | -0.27 | -0.77            | 0.23  | 0.28    |                   | -1.56 | -2.57            | -0.54 | <0.001  |                      | -0.04 | -0.32            | 0.25  | 0.80    |
| <b>Composite Social Health</b> |                   |       |                  |       |         |                   |       |                  |       |         |                   |       |                  |       |         |                      |       |                  |       |         |
| Positive                       | 94.6 ± 4          |       | <i>Reference</i> |       |         | 13 ± 4.6          |       | <i>Reference</i> |       |         | 39.3 ± 9.6        |       | <i>Reference</i> |       |         | 8.4 ± 2.6            |       | <i>Reference</i> |       |         |
| Discordant <sup>a</sup>        | 93.0 ± 4.5        | -1.46 | -2.11            | -0.81 | <0.001  | 12 ± 4.7          | -0.84 | -1.58            | -0.09 | 0.03    | 36.7 ± 10.4       | -2.67 | -4.19            | -1.15 | <0.001  | 7.6 ± 2.8            | -0.89 | -1.32            | -0.46 | <0.001  |
| Lonely                         | 94.0 ± 4.1        | -0.42 | -0.85            | 0.02  | 0.06    | 12.5 ± 4.8        | -0.32 | -0.82            | 0.18  | 0.21    | 37 ± 9.9          | -1.69 | -2.70            | -0.67 | <0.001  | 8.3 ± 2.6            | -0.08 | -0.36            | 0.21  | 0.59    |
| <b>Men</b>                     | <b>93.1 ± 4.5</b> |       |                  |       |         | <b>11.8 ± 4.6</b> |       |                  |       |         | <b>36.4 ± 9.7</b> |       |                  |       |         | <b>7.4 ± 2.8</b>     |       |                  |       |         |
| Socially Isolated (vs. not)    | 92.9 ± 4.6        | 0.09  | -0.64            | 0.81  | 0.81    | 11.7 ± 4.6        | 0.24  | -0.50            | 0.99  | 0.52    | 33.8 ± 8.8        | -1.90 | -3.39            | -0.42 | 0.01    | 7.2 ± 3              | 0.00  | -0.46            | 0.46  | 1.00    |
| Low Social Support (vs. not)   | 93.0 ± 4.5        | 0.28  | -0.49            | 1.05  | 0.48    | 11.2 ± 4.5        | -0.34 | -1.13            | 0.46  | 0.41    | 36 ± 8.9          | 0.44  | -1.16            | 2.04  | 0.59    | 6.9 ± 2.8            | -0.30 | -0.79            | 0.19  | 0.23    |
| Lonely (vs. not)               | 92.4 ± 4.4        | -0.32 | -0.91            | 0.26  | 0.28    | 11.3 ± 4.1        | -0.28 | -0.88            | 0.32  | 0.36    | 34.3 ± 9          | -0.90 | -2.09            | 0.30  | 0.14    | 6.9 ± 2.9            | -0.23 | -0.60            | 0.14  | 0.22    |
| <b>Mutually Adjusted</b>       |                   |       |                  |       |         |                   |       |                  |       |         |                   |       |                  |       |         |                      |       |                  |       |         |
| Socially Isolated (vs. not)    |                   | 0.04  | -0.71            | 0.79  | 0.91    |                   | 0.36  | -0.41            | 1.13  | 0.37    |                   | -2.09 | -3.62            | -0.55 | 0.01    |                      | 0.09  | -0.39            | 0.56  | 0.72    |

|                                |                                  |                                  |                                |                                 |
|--------------------------------|----------------------------------|----------------------------------|--------------------------------|---------------------------------|
| Low Social Support (vs. not)   | 0.28 -0.52 1.07 0.49             | -0.42 -1.24 0.40 0.32            | 1.02 -0.63 2.67 0.23           | -0.32 -0.82 0.18 0.22           |
| Lonely (vs. not)               | -0.33 -0.91 0.25 0.27            | -0.29 -0.89 0.31 0.35            | -0.84 -2.04 0.36 0.17          | -0.23 -0.60 0.14 0.22           |
| <b>Composite Social Health</b> |                                  |                                  |                                |                                 |
| Positive                       | 93.1 ± 4.5 <i>Reference</i>      | 11.8 ± 4.6 <i>Reference</i>      | 36.6 ± 9.7 <i>Reference</i>    | 7.4 ± 2.8 <i>Reference</i>      |
| Discordant <sup>a</sup>        | 93.0 ± 4.6 0.20 -0.39 0.80 0.50  | 11.2 ± 4.4 -0.40 -1.01 0.22 0.21 | 34.7 ± 9 -1.06 -2.29 0.17 0.09 | 7.2 ± 2.9 -0.08 -0.46 0.30 0.68 |
| Lonely                         | 92.4 ± 4.4 -0.32 -0.90 0.27 0.29 | 11.3 ± 4.1 -0.30 -0.90 0.30 0.33 | 34.3 ± 9 -0.95 -2.14 0.25 0.12 | 6.9 ± 2.9 -0.24 -0.60 0.13 0.21 |

*SD=Standard Deviation; β=Coefficient; CI=Confidence Interval; 3MS=Modified Mini-Mental State Examination; COWAT=Controlled Oral Word Association Test; SDMT=Symbol-Digit Modalities Test; HVLt-R=Hopkin's Verbal Learning Test – Revised*

*Adjusted for age (continuous), gender, level of education (≤12 or >12 years), place of birth (Australia or not Australia), and BMI (continuous).*

<sup>a</sup>*Discordant Social Health=socially isolated and/or low social support, but not lonely*

**Table E2: Fully adjusted Multivariable Analyses without CES-D of Longitudinal Associations Between Social Health and Cognitive Decline**

|                                | No Cognitive Decline<br>n (%) | Cognitive Decline<br>n (%) | HR   | 95% CI           |      | P value |
|--------------------------------|-------------------------------|----------------------------|------|------------------|------|---------|
| <b>Women</b>                   | <b>5,230 (85.3%)</b>          | <b>824 (13.4%)</b>         |      |                  |      |         |
| Socially Isolated (vs. not)    | 64 (81%)                      | 15 (19%)                   | 1.31 | 0.78             | 2.19 | 0.31    |
| Low Social Support (vs. not)   | 82 (80.4%)                    | 20 (19.6%)                 | 1.41 | 0.91             | 2.20 | 0.13    |
| Lonely (vs. not)               | 282 (85.2%)                   | 49 (14.8%)                 | 1.05 | 0.78             | 1.40 | 0.75    |
| <b>Mutually Adjusted</b>       |                               |                            |      |                  |      |         |
| Socially Isolated (vs. not)    |                               |                            | 1.19 | 0.69             | 2.04 | 0.53    |
| Low Social Support (vs. not)   |                               |                            | 1.35 | 0.85             | 2.15 | 0.21    |
| Lonely (vs. not)               |                               |                            | 1.03 | 0.77             | 1.38 | 0.82    |
| <b>Composite Social Health</b> |                               |                            |      |                  |      |         |
| Positive                       | 4,836 (86.6%)                 | 750 (13.4%)                |      | <i>Reference</i> |      |         |
| Discordant                     | 112 (81.8%)                   | 25 (18.3%)                 | 1.31 | 0.88             | 1.96 | 0.19    |
| Lonely                         | 282 (85.2%)                   | 49 (14.8%)                 | 1.06 | 0.79             | 1.41 | 0.71    |
| <b>Men</b>                     | <b>4,531 (84.4%)</b>          | <b>780 (14.5%)</b>         |      |                  |      |         |
| Socially Isolated (vs. not)    | 122 (86.5%)                   | 19 (13.5%)                 | 0.93 | 0.59             | 1.47 | 0.76    |
| Low Social Support (vs. not)   | 103 (83.7%)                   | 20 (16.3%)                 | 1.23 | 0.79             | 1.92 | 0.36    |
| Lonely (vs. not)               | 181 (81.5%)                   | 41 (18.5%)                 | 1.14 | 0.83             | 1.57 | 0.40    |
| <b>Mutually Adjusted</b>       |                               |                            |      |                  |      |         |
| Socially Isolated (vs. not)    |                               |                            | 0.88 | 0.55             | 1.41 | 0.60    |
| Low Social Support (vs. not)   |                               |                            | 1.26 | 0.80             | 2.00 | 0.32    |
| Lonely (vs. not)               |                               |                            | 1.14 | 0.83             | 1.57 | 0.41    |
| <b>Composite Social Health</b> |                               |                            |      |                  |      |         |
| Positive                       | 4,169 (85.5%)                 | 709 (14.5%)                |      | <i>Reference</i> |      |         |
| Discordant <sup>a</sup>        | 181 (85.8%)                   | 30 (14.2%)                 | 1.00 | 0.69             | 1.44 | 1.00    |
| Lonely                         | 181 (81.5%)                   | 41 (18.5%)                 | 1.14 | 0.83             | 1.57 | 0.40    |

Derived from a population of 11,498 followed for mean 4.5 ± 1.2 SD years. Cognitive decline had 40,249 person years of observation (mean 3.5 ± 1.5 SD years; median 3.1, IQR 5.0-2.9 years; range 0.6 – 7.1 years).

Adjusted for age (continuous), gender, level of education (≤12 or >12 years), place of birth (Australia or not Australia), BMI (continuous).

HR=Hazard Ratio; CI=Confidence Interval

<sup>a</sup>Discordant Social Health=socially isolated and/or low social support, but not lonely

**Table E3: Fully adjusted Multivariable Analyses without CES-D of Longitudinal Associations Between Social Health and Dementia**

|                                | No Dementia<br>n (%)  | Dementia<br>n (%) | HR   | 95% CI           |      | P value |
|--------------------------------|-----------------------|-------------------|------|------------------|------|---------|
| <b>Dementia Trigger</b>        | <b>11,092 (96.5%)</b> | <b>406 (3.5%)</b> |      |                  |      |         |
| Socially Isolated (vs. not)    | 216 (96%)             | 9 (4%)            | 0.97 | 0.48             | 1.96 | 0.93    |
| Low Social Support (vs. not)   | 215 (93.5%)           | 15 (6.5%)         | 1.78 | 1.06             | 2.99 | 0.03    |
| Lonely (vs. not)               | 536 (95.9%)           | 23 (4.1%)         | 1.06 | 0.69             | 1.61 | 0.79    |
| <b>Mutually Adjusted</b>       |                       |                   |      |                  |      |         |
| Socially Isolated (vs. not)    |                       |                   | 0.78 | 0.38             | 1.63 | 0.52    |
| Low Social Support (vs. not)   |                       |                   | 1.88 | 1.10             | 3.23 | 0.02    |
| Lonely (vs. not)               |                       |                   | 1.05 | 0.69             | 1.60 | 0.83    |
| <b>Composite Social Health</b> |                       |                   |      |                  |      |         |
| Positive                       | 10,223 (96.6%)        | 362 (3.4%)        |      | <i>Reference</i> |      |         |
| Discordant <sup>a</sup>        | 333 (94.1%)           | 21 (5.9%)         | 1.57 | 1.00             | 2.46 | 0.05    |
| Lonely                         | 536 (95.9%)           | 23 (4.1%)         | 1.08 | 0.71             | 1.65 | 0.73    |
| <b>Dementia Case</b>           | <b>11,269 (98%)</b>   | <b>229 (2%)</b>   |      |                  |      |         |
| Socially Isolated (vs. not)    | 219 (97.3%)           | 6 (2.7%)          | 1.37 | 0.61             | 3.09 | 0.45    |
| Low Social Support (vs. not)   | 221 (96.1%)           | 9 (3.9%)          | 1.91 | 0.98             | 3.73 | 0.06    |
| Lonely (vs. not)               | 549 (98.2%)           | 10 (1.8%)         | 0.79 | 0.42             | 1.49 | 0.46    |
| <b>Mutually Adjusted</b>       |                       |                   |      |                  |      |         |
| Socially Isolated (vs. not)    |                       |                   | 1.12 | 0.47             | 2.65 | 0.80    |
| Low Social Support (vs. not)   |                       |                   | 1.88 | 0.92             | 3.81 | 0.08    |
| Lonely (vs. not)               |                       |                   | 0.77 | 0.41             | 1.46 | 0.43    |
| <b>Composite Social Health</b> |                       |                   |      |                  |      |         |
| Positive                       | 10,378 (98%)          | 207 (2%)          |      | <i>Reference</i> |      |         |
| Discordant <sup>a</sup>        | 342 (96.6%)           | 12 (3.4%)         | 1.69 | 0.94             | 3.04 | 0.08    |
| Lonely                         | 549 (98.2%)           | 10 (1.8%)         | 0.81 | 0.43             | 1.52 | 0.51    |

Derived from a population of 11,498 followed for mean  $4.5 \pm 1.2$  SD years. Dementia trigger had 51,151 person years of observation (mean  $4.4 \pm 1.3$  SD years; median 4.5, IQR 5.5-3.5 years; range 0.2 – 7.3 years). Dementia cases had 51,400 person years of observation (mean  $4.5 \pm 1.2$  SD years; median 4.5, IQR 5.5-3.5 years; range 0.2 – 7.3 years).

Adjusted for age (continuous), gender, level of education ( $\leq 12$  or  $>12$  years), place of birth (Australia or not Australia), BMI (continuous).

HR=Hazard Ratio; CI=Confidence Interval

<sup>a</sup>Discordant Social Health=socially isolated and/or low social support, but not lonely



## Appendix F: Potential Dose-Response Relationship Assessment Between Social Health and Cognitive Decline/Dementia

**Table F1: Potential Dose-Response Relationship Assessment Between Social Health and Cognitive Decline**

|                                            | HR   | 95% CI           |      | P Values |
|--------------------------------------------|------|------------------|------|----------|
| <b>Social Isolation Quartiles: Women</b>   |      |                  |      |          |
| Positive (Low Social Isolation)            |      | <i>Reference</i> |      |          |
| 2                                          | 0.94 | 0.77             | 1.16 | 0.57     |
| 3                                          | 1.08 | 0.89             | 1.32 | 0.42     |
| Negative (High Social Isolation)           | 1.07 | 0.88             | 1.31 | 0.49     |
| <b>Social Isolation Quartiles: Men</b>     |      |                  |      |          |
| Positive (Low Social Isolation)            |      | <i>Reference</i> |      |          |
| 2                                          | 0.92 | 0.75             | 1.14 | 0.47     |
| 3                                          | 1.08 | 0.88             | 1.32 | 0.48     |
| Negative (High Social Isolation)           | 1.30 | 1.06             | 1.59 | 0.01     |
| <b>Low Social Support Quartiles: Women</b> |      |                  |      |          |
| Positive (High Social Support)             |      | <i>Reference</i> |      |          |
| 2                                          | 0.92 | 0.75             | 1.12 | 0.38     |
| 3                                          | 0.93 | 0.76             | 1.14 | 0.47     |
| Negative (Low Social Support)              | 0.90 | 0.74             | 1.08 | 0.26     |
| <b>Low Social Support Quartiles: Men</b>   |      |                  |      |          |
| Positive (High Social Support)             |      | <i>Reference</i> |      |          |
| 2                                          | 1.01 | 0.82             | 1.24 | 0.94     |
| 3                                          | 1.09 | 0.88             | 1.36 | 0.43     |
| Negative (Low Social Support)              | 1.12 | 0.92             | 1.37 | 0.25     |
| <b>Loneliness Categories: Women</b>        |      |                  |      |          |
| Positive (Low Loneliness)                  |      | <i>Reference</i> |      |          |
| Medium                                     | 1.12 | 0.90             | 1.39 | 0.30     |
| Negative (High Loneliness)                 | 0.99 | 0.73             | 1.34 | 0.94     |
| <b>Loneliness Categories: Men</b>          |      |                  |      |          |
| Positive (Low Loneliness)                  |      | <i>Reference</i> |      |          |
| Medium                                     | 0.99 | 0.74             | 1.32 | 0.95     |
| Negative (High Loneliness)                 | 0.90 | 0.64             | 1.28 | 0.57     |

Derived from a population of 11,498 followed for mean  $4.5 \pm 1.2$  SD years. Cognitive decline had 40,249 person years of observation (mean  $3.5 \pm 1.5$  SD years; median 3.1, IQR 5.0-2.9 years; range 0.6 – 7.1 years).

Adjusted for age (continuous), gender, level of education ( $\leq 12$  or  $>12$  years), place of birth (Australia or not Australia), BMI (continuous) and CES-D score ( $<8$  or  $\geq 8$ ).

HR=Hazard Ratio; CI=Confidence Interval

**Table F2: Potential Dose-Response Relationship Assessment Between Social Health and Dementia**

| <b>DEMENTIA TRIGGER</b>                    | <b>HR</b> | <b>95% CI</b>    |      | <b>P Values</b> |
|--------------------------------------------|-----------|------------------|------|-----------------|
| <b>Social Isolation Quartiles: Women</b>   |           |                  |      |                 |
| Positive (Low Social Isolation)            |           | <i>Reference</i> |      |                 |
| 2                                          | 0.84      | 0.55             | 1.31 | 0.45            |
| 3                                          | 0.81      | 0.52             | 1.26 | 0.35            |
| Negative (High Social Isolation)           | 1.37      | 0.93             | 2.02 | 0.11            |
| <b>Social Isolation Quartiles: Men</b>     |           |                  |      |                 |
| Positive (Low Social Isolation)            |           | <i>Reference</i> |      |                 |
| 2                                          | 0.80      | 0.54             | 1.20 | 0.28            |
| 3                                          | 1.11      | 0.77             | 1.61 | 0.56            |
| Negative (High Social Isolation)           | 0.93      | 0.63             | 1.37 | 0.71            |
| <b>Low Social Support Quartiles: Women</b> |           |                  |      |                 |
| Positive (High Social Support)             |           | <i>Reference</i> |      |                 |
| 2                                          | 1.15      | 0.76             | 1.73 | 0.51            |
| 3                                          | 0.64      | 0.39             | 1.04 | 0.07            |
| Negative (Low Social Support)              | 1.08      | 0.73             | 1.60 | 0.70            |
| <b>Low Social Support Quartiles: Men</b>   |           |                  |      |                 |
| Positive (High Social Support)             |           | <i>Reference</i> |      |                 |
| 2                                          | 1.00      | 0.68             | 1.48 | 1.00            |
| 3                                          | 1.23      | 0.83             | 1.82 | 0.31            |
| Negative (Low Social Support)              | 0.92      | 0.62             | 1.36 | 0.67            |
| <b>Loneliness Categories</b>               |           |                  |      |                 |
| Positive (Low Loneliness)                  |           | <i>Reference</i> |      |                 |
| Medium                                     | 1.45      | 1.08             | 1.96 | 0.01            |
| Negative (High Loneliness)                 | 1.01      | 0.64             | 1.58 | 0.98            |
| <b>DEMENTIA CASE</b>                       |           |                  |      |                 |
| <b>Social Isolation Quartiles: Women</b>   |           |                  |      |                 |
| Positive (Low Social Isolation)            |           | <i>Reference</i> |      |                 |
| 2                                          | 1.16      | 0.63             | 2.11 | 0.63            |
| 3                                          | 1.09      | 0.59             | 2.00 | 0.79            |
| Negative (High Social Isolation)           | 1.57      | 0.89             | 2.75 | 0.12            |
| <b>Social Isolation Quartiles: Men</b>     |           |                  |      |                 |
| Positive (Low Social Isolation)            |           | <i>Reference</i> |      |                 |
| 2                                          | 0.96      | 0.57             | 1.60 | 0.87            |
| 3                                          | 1.10      | 0.67             | 1.81 | 0.70            |
| Negative (High Social Isolation)           | 1.01      | 0.61             | 1.68 | 0.98            |
| <b>Low Social Support Quartiles: Women</b> |           |                  |      |                 |
| Positive (High Social Support)             |           | <i>Reference</i> |      |                 |
| 2                                          | 1.02      | 0.57             | 1.82 | 0.96            |
| 3                                          | 0.72      | 0.38             | 1.37 | 0.32            |
| Negative (Low Social Support)              | 1.20      | 0.71             | 2.04 | 0.49            |
| <b>Low Social Support Quartiles: Men</b>   |           |                  |      |                 |
| Positive (High Social Support)             |           | <i>Reference</i> |      |                 |
| 2                                          | 1.12      | 0.67             | 1.86 | 0.67            |
| 3                                          | 1.30      | 0.77             | 2.19 | 0.33            |
| Negative (Low Social Support)              | 0.98      | 0.58             | 1.64 | 0.93            |

### Loneliness Categories

| Loneliness Categories      |      | Reference |      |      |
|----------------------------|------|-----------|------|------|
| Positive (Low Loneliness)  |      |           |      |      |
| Medium                     | 0.91 | 0.58      | 1.45 | 0.71 |
| Negative (High Loneliness) | 0.72 | 0.37      | 1.40 | 0.33 |

*Derived from a population of 11,498 followed for mean 4.5 ± 1.2 SD years. Dementia trigger had 51,151 person years of observation (mean 4.4 ± 1.3 SD years; median 4.5, IQR 5.5-3.5 years; range 0.2 – 7.3 years). Dementia cases had 51,400 person years of observation (mean 4.5 ± 1.2 SD years; median 4.5, IQR 5.5-3.5 years; range 0.2 – 7.3 years).*

*Adjusted for age (continuous), gender, level of education (≤12 or >12 years), place of birth (Australia or not Australia), BMI (continuous) and CES-D score (<8 or ≥8).*

*HR=Hazard Ratio; CI=Confidence Interval*
